# Supplementary material for: Facial Dysmorphic Features in a Patient With Nonketotic Hypoglycemia and a Pathogenic Variant in the AKT2 Gene
Source: PubMed Central journal article supplement — AACE Clin Case Rep. 2021 Nov 27;8(3):109–12. doi: 10.1016/j.aace.2021.11.006 (PMC9123592; doi:10.1016/j.aace.2021.11.006), 2021-11-27
Supplement: mmc1.pdf [file mmc1.pdf]

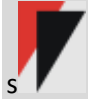

MANUSCRIPT TITLE

**Facial dysmorphic features in a patient with non-ketotic hypoglycemia and a pathogenic variant in the AKT2 gene**

DATE ISSUED

**7th October, 2021**

This document certifies that the manuscript listed above was edited for proper English, grammar, punctuation, spelling by one or two of the highly qualified native English speakers at the Cambridge Proofreading Group. Neither the research content nor the authors' were altered in any way during the editing process. However, the author has the ability to accept or reject our suggestions or changes.

If you have any questions or concerns about the edited document, please contact us at [contact@cambridgeproofreading.online](mailto:contact@cambridgeproofreading.online)
